# Supplementary material for: Epistatic interactions promote resistance against direct-acting antivirals targeting the HCV NS3 protein
Source: Research Square preprint supplement (doi:10.21203/rs.3.rs-2487027/v1), 2023-01-27
Supplement: Supplementary file 1 [file 48ff6350f05e042b1ca715d7.xlsx]

## Sheet: Sheet2
Tong2014	Isolate	Infectivity				Dultz2021	Isolate	Infectivity	Groups
	H77 (WT)	1					H77	100.325	1
	R155K	0.11					Q80K	91.5584	2
	V36M	0.94					Q80K+A91S+S174N	51.6234	3
	V36M+R155K	0.12					Q80K+S174N	95.4545	2
	S122G	1.9					Q80K+A91T+S174N	50.6494	3
	S122G+R155K	0.45
	A383G	1
	A383G+R115K	0.15
Honegger2013	Isolate	Infectivity				Dultz2020	Isolate			Infectivity		Groups			Infectivity		Groups
	H77S.3-NS3	100					Residue	Variant	NS3-Q41R	Low	High			NS3-Q41	Low	High
	L1403F	17.7966					V36	A	50.4	37.9191	62.8902	1		89.7	82.7746	96.6474	1
	K1398R/A1409T	20.339						L	76.7	56.4162	97.1098	1		100.8	94.3353	107.746	1
								M	27.8	23.5838	32.3699	4		94.7	87.8613	101.734	3
							F43	S	3.2	2.31214	4.16185	2		70.2	63.3526	77.2254	5
							Q80	R	24.1	23.1214	24.9711	4		51.4	44.3931	58.2659	7
							S138	T	1.4	0.924855	1.84971	7		0.2	0.462428	6.93642	8
							R155	K	23.2	21.2717	25.4335	6		47.1	40.2312	54.104	7
Berger2016	Isolate	Infectivity						E	141.0	139.191	143.353	14		97.9	91.0983	104.509	4
	H77	100						Y	55.4	53.6416	57.8035	16		54.2	47.1676	61.0405	18
	R155G	32						WT	100	88.7861	111.445	15		100	92.948	107.746	17
	R155K	190
	R155S	78
	D168V	2.8					Q41R+D168E			111972
							D168E			62323.9
