# Supplementary material for: Epistatic interactions promote resistance against direct-acting antivirals targeting the HCV NS3 protein
Source: Research Square preprint supplement (doi:10.21203/rs.3.rs-2487027/v1), 2023-01-27
Supplement: Supplementary file 3 [file 87276deb5a2328ad69695ece.xlsx]

## Sheet: Sheet1
'AB520610'
'AF009606'
'AF011751'
'AF011752'
'AF011753'
'AF271632'
'AJ278830'
'AY695436'
'AY695437'
'AY956463'
'AY956464'
'AY956465'
'AY956466'
'AY956468'
'AY956469'
'D10749'
'DQ068178'
'DQ068179'
'DQ068180'
'DQ068181'
'DQ068182'
'DQ068183'
'DQ068184'
'DQ068185'
'DQ068186'
'DQ068187'
'DQ068188'
'DQ068189'
'DQ068190'
'DQ068191'
'DQ068192'
'DQ068193'
'DQ068194'
'DQ068195'
'DQ068196'
'DQ068197'
'DQ068198'
'DQ068199'
'DQ068200'
'DQ068201'
'DQ068202'
'DQ068203'
'DQ068204'
'DQ068205'
'DQ068206'
'DQ068207'
'DQ430811'
'DQ430812'
'DQ430813'
'DQ430814'
'DQ838739'
'DQ889263'
'DQ889264'
'DQ889268'
'DQ889271'
'DQ889290'
'DQ889291'
'DQ889295'
'DQ889296'
'DQ889308'
'DQ889312'
'DQ889314'
'EF032883'
'EF032884'
'EF032885'
'EF032886'
'EF032887'
'EF032889'
'EF032890'
'EF032896'
'EF032897'
'EF032898'
'EF032899'
'EF032900'
'EF139657'
'EF139658'
'EF139659'
'EF139666'
'EF139671'
'EF139673'
'EF139676'
'EF139678'
'EF139683'
'EF139695'
'EF139698'
'EF139707'
'EF139710'
'EF139715'
'EF139719'
'EF139725'
'EF139728'
'EF139729'
'EF139735'
'EF139736'
'EF139740'
'EF139749'
'EF139759'
'EF139760'
'EF139761'
'EF139762'
'EF139764'
'EF139773'
'EF173627'
'EF173628'
'EF173629'
'EF173630'
'EF173631'
'EF173632'
'EF173633'
'EF173634'
'EF173635'
'EF173636'
'EF173637'
'EF173638'
'EF173639'
'EF173640'
'EF173641'
'EF173642'
'EF173643'
'EF173644'
'EF173645'
'EF173646'
'EF173647'
'EF173648'
'EF173649'
'EF173650'
'EF173651'
'EF173652'
'EF173653'
'EF173654'
'EF407411'
'EF407412'
'EF407413'
'EF407414'
'EF407415'
'EF407416'
'EF407417'
'EF407418'
'EF407419'
'EF407420'
'EF407421'
'EF407422'
'EF407423'
'EF407424'
'EF407425'
'EF407426'
'EF407427'
'EF407428'
'EF407429'
'EF407430'
'EF407431'
'EF407432'
'EF407433'
'EF407434'
'EF407435'
'EF407436'
'EF407437'
'EF407438'
'EF407439'
'EF407440'
'EF407441'
'EF407442'
'EF407443'
'EF407444'
'EF407445'
'EF407446'
'EF407447'
'EF407448'
'EF407449'
'EF407450'
'EF407451'
'EF407452'
'EF407453'
'EF407454'
'EF407455'
'EF407456'
'EF407457'
'EF621489'
'EU155213'
'EU155214'
'EU155215'
'EU155216'
'EU155233'
'EU155236'
'EU155237'
'EU155238'
'EU155239'
'EU155240'
'EU155242'
'EU155243'
'EU155244'
'EU155245'
'EU155246'
'EU155248'
'EU155249'
'EU155250'
'EU155251'
'EU155252'
'EU155266'
'EU155267'
'EU155268'
'EU155269'
'EU155270'
'EU155271'
'EU155272'
'EU155274'
'EU155275'
'EU155276'
'EU155277'
'EU155278'
'EU155282'
'EU155283'
'EU155284'
'EU155285'
'EU155286'
'EU155287'
'EU155288'
'EU155289'
'EU155290'
'EU155291'
'EU155292'
'EU155293'
'EU155294'
'EU155295'
'EU155296'
'EU155297'
'EU155298'
'EU155299'
'EU155309'
'EU155310'
'EU155311'
'EU155313'
'EU155314'
'EU155319'
'EU155320'
'EU155321'
'EU155322'
'EU155323'
'EU155338'
'EU155339'
'EU155340'
'EU155341'
'EU155342'
'EU155343'
'EU155344'
'EU155345'
'EU155346'
'EU155347'
'EU155348'
'EU155349'
'EU155351'
'EU155352'
'EU155353'
'EU155354'
'EU155355'
'EU155378'
'EU155380'
'EU234063'
'EU234064'
'EU234065'
'EU239713'
'EU239715'
'EU239716'
'EU250017'
'EU255927'
'EU255928'
'EU255929'
'EU255930'
'EU255931'
'EU255932'
'EU255933'
'EU255934'
'EU255935'
'EU255936'
'EU255937'
'EU255938'
'EU255939'
'EU255940'
'EU255941'
'EU255942'
'EU255943'
'EU255944'
'EU255945'
'EU255946'
'EU255947'
'EU255948'
'EU255949'
'EU255950'
'EU255951'
'EU255952'
'EU255953'
'EU255954'
'EU255955'
'EU255956'
'EU255957'
'EU255958'
'EU255963'
'EU255964'
'EU255965'
'EU255966'
'EU255968'
'EU255969'
'EU255970'
'EU255971'
'EU255973'
'EU255974'
'EU255975'
'EU255976'
'EU255977'
'EU255978'
'EU255979'
'EU255980'
'EU255981'
'EU255982'
'EU255983'
'EU255984'
'EU255985'
'EU255986'
'EU255987'
'EU255988'
'EU255989'
'EU255990'
'EU255991'
'EU255992'
'EU255993'
'EU255994'
'EU255995'
'EU255996'
'EU255997'
'EU255998'
'EU255999'
'EU256002'
'EU256003'
'EU256004'
'EU256005'
'EU256006'
'EU256007'
'EU256008'
'EU256009'
'EU256010'
'EU256011'
'EU256012'
'EU256013'
'EU256014'
'EU256015'
'EU256016'
'EU256017'
'EU256018'
'EU256019'
'EU256020'
'EU256021'
'EU256022'
'EU256023'
'EU256024'
'EU256025'
'EU256026'
'EU256027'
'EU256028'
'EU256029'
'EU256030'
'EU256031'
'EU256032'
'EU256033'
'EU256034'
'EU256035'
'EU256036'
'EU256037'
'EU256038'
'EU256039'
'EU256040'
'EU256041'
'EU256043'
'EU256044'
'EU256046'
'EU256047'
'EU256048'
'EU256049'
'EU256050'
'EU256051'
'EU256052'
'EU256053'
'EU256057'
'EU256058'
'EU256060'
'EU256067'
'EU256068'
'EU256069'
'EU256070'
'EU256071'
'EU256072'
'EU256073'
'EU256074'
'EU256087'
'EU256094'
'EU256095'
'EU256096'
'EU256097'
'EU256104'
'EU256105'
'EU256106'
'EU256107'
'EU260395'
'EU260396'
'EU362876'
'EU362877'
'EU362878'
'EU362879'
'EU362880'
'EU362881'
'EU362882'
'EU362883'
'EU362884'
'EU362885'
'EU362886'
'EU362887'
'EU362888'
'EU362889'
'EU362890'
'EU362891'
'EU362892'
'EU362893'
'EU362894'
'EU362895'
'EU362896'
'EU362897'
'EU362898'
'EU362899'
'EU362900'
'EU362901'
'EU362902'
'EU362903'
'EU362904'
'EU362905'
'EU362906'
'EU362907'
'EU362908'
'EU362909'
'EU362910'
'EU362911'
'EU482831'
'EU482832'
'EU482834'
'EU482835'
'EU482836'
'EU482837'
'EU482838'
'EU482840'
'EU482841'
'EU482842'
'EU482843'
'EU482844'
'EU482845'
'EU482846'
'EU482847'
'EU482848'
'EU482850'
'EU482852'
'EU482853'
'EU482854'
'EU482855'
'EU482856'
'EU482857'
'EU482858'
'EU482861'
'EU482862'
'EU482863'
'EU482864'
'EU482865'
'EU482866'
'EU482867'
'EU482868'
'EU482869'
'EU482870'
'EU482871'
'EU482872'
'EU482873'
'EU482876'
'EU482878'
'EU482882'
'EU482884'
'EU529676'
'EU529677'
'EU529678'
'EU529679'
'EU529680'
'EU529681'
'EU569722'
'EU569723'
'EU595697'
'EU595698'
'EU595699'
'EU622929'
'EU622930'
'EU622931'
'EU622932'
'EU622933'
'EU660383'
'EU660384'
'EU660385'
'EU677247'
'EU677248'
'EU677249'
'EU677250'
'EU677251'
'EU677252'
'EU677253'
'EU677254'
'EU677255'
'EU677256'
'EU677257'
'EU677258'
'EU781746'
'EU781747'
'EU781748'
'EU781749'
'EU781750'
'EU781751'
'EU781752'
'EU781753'
'EU781754'
'EU781755'
'EU781756'
'EU781757'
'EU781758'
'EU781759'
'EU781760'
'EU781761'
'EU781762'
'EU781763'
'EU781764'
'EU781765'
'EU781766'
'EU781767'
'EU781768'
'EU781769'
'EU781770'
'EU781771'
'EU781772'
'EU781773'
'EU781774'
'EU781775'
'EU781776'
'EU781777'
'EU781778'
'EU781779'
'EU781780'
'EU781781'
'EU781782'
'EU781783'
'EU781784'
'EU781785'
'EU781786'
'EU781787'
'EU781788'
'EU781789'
'EU781790'
'EU781791'
'EU781792'
'EU781793'
'EU781794'
'EU781795'
'EU781796'
'EU781797'
'EU781798'
'EU781799'
'EU781800'
'EU781801'
'EU781802'
'EU781803'
'EU781804'
'EU781805'
'EU781806'
'EU781807'
'EU781808'
'EU781809'
'EU781810'
'EU781811'
'EU781812'
'EU781813'
'EU781814'
'EU781815'
'EU781816'
'EU781817'
'EU781818'
'EU781819'
'EU781820'
'EU781821'
'EU781822'
'EU781823'
'EU781824'
'GQ848759'
'GQ848760'
'GQ848761'
'GQ848762'
'GQ848764'
'GQ848765'
'GQ848766'
'GQ848767'
'GQ848768'
'GQ848769'
'GQ848770'
'GQ870541'
'HM000514'
'HM000515'
'HM000516'
'HM000517'
'HM000518'
'HM000519'
'HM000520'
'HM000521'
'HM000522'
'HM000523'
'HM000524'
'HM000525'
'HM000526'
'HM000527'
'HM000528'
'HM000529'
'HM000530'
'HM000531'
'HM000532'
'HM000533'
'HM000534'
'HM000535'
'HM000536'
'HM000537'
'HM000538'
'HM000539'
'HM000540'
'HM000541'
'HM000542'
'HM568417'
'HM568418'
'HM568419'
'HM568420'
'HM568421'
'HM568422'
'HM568423'
'HM568424'
'HM568425'
'HM568426'
'HM746870'
'HM746876'
'HM746877'
'HM746878'
'HM746879'
'HM746880'
'HM746882'
'JN704193'
'JN704194'
'JN704198'
'JN704199'
'JN704202'
'JN704203'
'JN704204'
'JN704206'
'JN704208'
'JN704210'
'JN704219'
'JN704224'
'JN704229'
'JN704230'
'JN704231'
'JN704232'
'JN704233'
'JN704234'
'JN704235'
'JN704236'
'JN704237'
'JN704238'
'JN704239'
'JN704240'
'JN704241'
'JN704242'
'JN704244'
'JN704246'
'JN704247'
'JN704248'
'JN704249'
'JN704250'
'JN704251'
'JN704252'
'JN704253'
'JN704254'
'JN704256'
'JN704257'
'JN704260'
'JN704261'
'JN704262'
'JN704263'
'JN704264'
'JN704266'
'JN704267'
'JN704268'
'JN704269'
'JN704270'
'JN704273'
'JN704274'
'JN704276'
'JN704277'
'JN704278'
'JN704280'
'JN704281'
'JN704282'
'JN704283'
'JN704284'
'JN704285'
'JN704286'
'JN704290'
'JN704293'
'JN704294'
'JN704295'
'JQ061779'
'JQ061780'
'JQ061781'
'JQ061782'
'JQ061783'
'JQ061785'
'JQ061786'
'JQ061787'
'JQ343804'
'JQ343805'
'JQ343806'
'JQ343807'
'JQ343808'
'JQ343809'
'JQ343810'
'JQ343812'
'JQ343813'
'JQ343814'
'JQ343815'
'JQ343816'
'JQ343819'
'JQ343820'
'JQ343821'
'JQ343822'
'JQ343823'
'JQ343824'
'JQ343825'
'JQ343826'
'JQ801853'
'JQ801854'
'JQ801855'
'JQ801856'
'JQ801857'
'JQ801858'
'JQ801859'
'JQ801860'
'JQ801861'
'JQ801862'
'JQ801863'
'JQ801864'
'JQ801865'
'JQ801866'
'JQ801867'
'JQ801868'
'JQ801869'
'JQ801870'
'JQ801871'
'JQ801872'
'JQ801905'
'JQ801906'
'JQ801907'
'JQ801908'
'JQ801909'
'JQ801910'
'JQ801911'
'JQ801912'
'JQ801913'
'JQ801914'
'JQ801915'
'JQ801916'
'JQ801917'
'JQ801918'
'JQ801919'
'JQ801920'
'JQ801921'
'JQ801949'
'JQ801950'
'JQ801951'
'JQ801952'
'JQ801953'
'JQ801954'
'JQ801955'
'JQ801956'
'JQ801957'
'JQ801958'
'JQ801959'
'JQ801960'
'JQ801961'
'JQ801962'
'JQ801963'
'JQ801964'
'JQ801965'
'JQ801966'
'JQ801967'
'JQ801968'
'JQ801969'
'JQ801970'
'JQ801971'
'JQ801972'
'JQ801973'
'JQ801974'
'JQ801975'
'JQ801976'
'JQ801977'
'JQ801978'
'JQ801979'
'JQ801980'
'JQ801981'
'JQ801982'
'JQ801983'
'JQ801984'
'JQ801985'
'JQ801986'
'JQ801987'
'JQ801988'
'JQ801989'
'JQ801990'
'JQ801991'
'JQ801992'
'JQ801993'
'JQ801994'
'JQ801995'
'JQ801996'
'JQ801997'
'JQ801998'
'JQ801999'
'JQ802000'
'JQ802001'
'JQ802002'
'JQ802003'
'JQ802004'
'JQ802005'
'JQ802006'
'JQ802007'
'JQ802008'
'JQ802009'
'JQ802010'
'JQ802011'
'JQ802012'
'JQ802013'
'JQ802014'
'JQ802015'
'JQ802102'
'JQ802103'
'JQ802106'
'JQ802107'
'JQ802108'
'JQ802110'
'JQ802111'
'JQ802113'
'JQ802114'
'JQ802115'
'JQ802116'
'JQ802117'
'JQ802118'
'JQ802119'
'JQ802120'
'JQ802121'
'JQ802122'
'JQ802123'
'JQ802124'
'JQ802125'
'JQ802126'
'JQ802127'
'JQ802128'
'JQ802129'
'JQ802130'
'JQ802131'
'JQ802132'
'JQ802133'
'JQ802134'
'JQ802135'
'JQ802136'
'JQ802137'
'JQ802138'
'JQ802139'
'JQ802140'
'JQ802141'
'JQ802142'
'JQ802143'
'JQ802451'
'JQ802452'
'JQ802453'
'JQ802454'
'JQ802455'
'JQ802456'
'JQ802457'
'JQ802458'
'JQ802459'
'JQ802460'
'JQ802461'
'JQ802462'
'JQ802463'
'JQ802464'
'JQ802465'
'JQ802466'
'JQ802467'
'JQ802468'
'JQ802469'
'JQ802470'
'JQ802471'
'JQ802472'
'JQ802473'
'JQ802474'
'JQ802475'
'JQ802476'
'JQ802477'
'JQ802478'
'JQ802479'
'JQ802480'
'JQ802481'
'JQ802482'
'JQ802483'
'JQ802484'
'JQ802485'
'JQ802486'
'JQ802487'
'JQ802488'
'JQ802489'
'JQ802490'
'JQ802491'
'JQ802492'
'JQ802493'
'JQ802494'
'JQ802495'
'JQ802496'
'JQ802497'
'JQ802498'
'JQ802499'
'JQ802500'
'JQ802501'
'JQ802502'
'JQ802503'
'JQ802504'
'JQ802505'
'JQ802506'
'JQ802507'
'JQ802508'
'JQ802509'
'JQ802510'
'JQ803262'
'JQ803263'
'JQ803264'
'JQ803265'
'JQ803266'
'JQ803267'
'JQ803268'
'JQ803269'
'JQ803270'
'JQ803271'
'JQ803272'
'JQ803273'
'JQ803274'
'JQ803275'
'JQ803276'
'JQ803277'
'JQ803278'
'JQ803279'
'JQ803280'
'JQ803281'
'JQ803282'
'JQ803283'
'JQ803284'
'JQ803285'
'JQ803286'
'JQ803287'
'JQ803288'
'JQ803289'
'JQ803290'
'JQ803291'
'JQ803292'
'JQ803293'
'JQ803294'
'JQ803295'
'JQ803296'
'JQ803297'
'JQ803298'
'JQ803299'
'JQ803300'
'JQ803301'
'JQ803302'
'JQ803303'
'JQ803304'
'JQ803305'
'JQ803306'
'JQ803307'
'JQ803308'
'JQ803309'
'JQ803310'
'JQ803311'
'JQ803313'
'JQ803314'
'JQ803315'
'JQ803316'
'JQ803317'
'JQ803318'
'JQ803319'
'JQ803320'
'JQ803321'
'JQ803322'
'JQ803323'
'JQ803324'
'JQ803325'
'JQ803326'
'JQ803327'
'JQ803328'
'JQ803329'
'JQ803330'
'JQ803331'
'JQ803332'
'JQ803333'
'JQ803334'
'JQ803335'
'JQ803336'
'JQ803337'
'JQ803338'
'JQ803339'
'JQ803340'
'JQ803341'
'JQ803342'
'JQ803343'
'JQ803344'
'JQ803345'
'JQ803346'
'JQ803347'
'JQ803348'
'JQ803349'
'JQ803350'
'JQ803351'
'JQ803352'
'JQ803353'
'JQ803354'
'JQ803355'
'JQ803356'
'JQ803357'
'JQ803358'
'JQ803359'
'JQ803360'
'JQ803361'
'JQ803362'
'JQ803363'
'JQ803364'
'JQ803365'
'JQ803366'
'JQ803367'
'JQ803368'
'JQ803369'
'JQ803370'
'JQ803371'
'JQ803372'
'JQ803373'
'JQ803374'
'JQ803375'
'JQ803376'
'JQ803377'
'JQ803378'
'JQ803379'
'JQ803380'
'JQ803381'
'JQ803382'
'JQ803574'
'JQ803576'
'JQ803594'
'JQ803595'
'JQ803597'
'JQ803598'
'JQ914271'
'JQ914272'
'JQ914273'
'JQ914274'
'JX178422'
'JX178423'
'JX178424'
'JX178425'
'JX178426'
'JX178427'
'JX178428'
'JX178429'
'JX178430'
'JX178431'
'JX178432'
'JX178433'
'JX178434'
'JX178435'
'JX178436'
'JX178437'
'JX178438'
'JX178439'
'JX178440'
'JX178441'
'JX178442'
'JX178443'
'JX437282'
'JX437283'
'JX437284'
'JX437285'
'JX437286'
'JX437287'
'JX437289'
'JX437290'
'JX437291'
'JX437292'
'JX437293'
'JX437294'
'JX437295'
'JX437298'
'JX437299'
'JX437300'
'JX437301'
'JX437302'
'JX437304'
'JX437305'
'JX437307'
'JX437308'
'JX437310'
'JX437311'
'JX437312'
'JX437313'
'JX437314'
'JX437315'
'JX437316'
'JX437317'
'JX437318'
'JX437319'
'JX437320'
'JX437323'
'JX437324'
'JX437328'
'JX437329'
'JX437330'
'JX437331'
'JX437332'
'JX437333'
'JX437335'
'JX437336'
'JX437338'
'JX437339'
'JX437340'
'JX437341'
'JX437342'
'JX437344'
'JX437345'
'JX437346'
'JX437347'
'JX437348'
'JX437349'
'JX437350'
'JX437351'
'JX437352'
'JX437353'
'JX437355'
'JX437356'
'JX437357'
'JX437358'
'JX437359'
'JX437360'
'JX437361'
'JX437362'
'JX437364'
'JX437365'
'JX437366'
'JX437367'
'JX463525'
'JX463526'
'JX463527'
'JX463528'
'JX463529'
'JX463530'
'JX463531'
'JX463532'
'JX463533'
'JX463534'
'JX463535'
'JX463536'
'JX463537'
'JX463538'
'JX463539'
'JX463540'
'JX463541'
'JX463542'
'JX463543'
'JX463544'
'JX463545'
'JX463546'
'JX463547'
'JX463548'
'JX463549'
'JX463550'
'JX463551'
'JX463552'
'JX463553'
'JX463554'
'JX463555'
'JX463556'
'JX463557'
'JX463558'
'JX463559'
'JX463560'
'JX463561'
'JX463562'
'JX463563'
'JX463564'
'JX463565'
'JX463566'
'JX463567'
'JX463568'
'JX463569'
'JX463570'
'JX463571'
'JX463572'
'JX463573'
'JX463574'
'JX463575'
'JX463576'
'JX463577'
'JX463578'
'JX463579'
'JX463580'
'JX463581'
'JX463582'
'JX463583'
'JX463584'
'JX463585'
'JX463586'
'JX463587'
'JX463588'
'JX463589'
'JX463590'
'JX463591'
'JX463592'
'JX463593'
'JX463594'
'JX463595'
'JX463596'
'JX463597'
'JX463598'
'JX463599'
'JX463600'
'JX463601'
'JX463602'
'JX463603'
'JX463604'
'JX463605'
'JX463606'
'JX463607'
'JX463608'
'JX463609'
'JX463610'
'JX463611'
'JX463612'
'JX463613'
'JX463614'
'JX463615'
'JX463616'
'JX463617'
'JX463618'
'JX463619'
'JX463620'
'JX463621'
'JX463622'
'JX463623'
'JX463624'
'JX463625'
'JX463626'
'JX463627'
'JX463628'
'JX463629'
'JX463630'
'JX463631'
'JX463632'
'JX463633'
'JX463634'
'JX463635'
'JX463636'
'JX463637'
'JX463638'
'JX463639'
'JX463640'
'JX463641'
'JX472005'
'JX472006'
'JX472007'
'JX472008'
'JX472009'
'JX472010'
'JX472011'
'JX472012'
'JX472013'
'KC125008'
'KC125010'
'KC125011'
'KC125012'
'KC125013'
'KC125014'
'KC125015'
'KC125016'
'KC125017'
'KC125018'
'KC125019'
'KC125020'
'KC125021'
'KC125022'
'KC125023'
'KC125024'
'KC125025'
'KC125026'
'KC125027'
'KC125028'
'KC125029'
'KC125030'
'KC125031'
'KC125032'
'KC125033'
'KC125034'
'KC125035'
'KC125036'
'KC125037'
'KC125038'
'KC125039'
'KC125040'
'KC125041'
'KC125042'
'KC125043'
'KC125044'
'KC125045'
'KC125046'
'KC125047'
'KC125048'
'KC125049'
'KC125050'
'KC125051'
'KC125052'
'KC125053'
'KC125054'
'KC125055'
'KC125056'
'KC125057'
'KC125058'
'KC125059'
'KC125060'
'KC125061'
'KC125062'
'KC125063'
'KC125064'
'KC125065'
'KC125066'
'KC125067'
'KC125068'
'KC125069'
'KC125070'
'KC125071'
'KC125072'
'KC125073'
'KC125074'
'KC125075'
'KC125076'
'KC125077'
'KC125078'
'KC125079'
'KC125080'
'KC125081'
'KC125082'
'KC125083'
'KC125084'
'KC125085'
'KC125086'
'KC125087'
'KC125088'
'KC125089'
'KC125090'
'KC125091'
'KC125092'
'KC125093'
'KC125094'
'KC125095'
'KC125096'
'KC125097'
'KC125098'
'KC125099'
'KC125100'
'KC125101'
'KC125103'
'KC125104'
'KC125105'
'KC125106'
'KC125107'
'KC125108'
'KC125109'
'KC125110'
'KC125111'
'KC125112'
'KC125113'
'KC125114'
'KC125115'
'KC125116'
'KC125117'
'KC125118'
'KC125119'
'KC125120'
'KC125121'
'KC125122'
'KC125123'
'KC125124'
'KC125125'
'KC125126'
'KC125127'
'KC125128'
'KC125129'
'KC125130'
'KC125131'
'KC125132'
'KC125133'
'KC125134'
'KC125135'
'KC125136'
'KC125137'
'KC125138'
'KC125139'
'KC125140'
'KC125141'
'KC125142'
'KC125143'
'KC125144'
'KC125145'
'KC125146'
'KC125147'
'KC125148'
'KC125149'
'KC125150'
'KC125151'
'KC125152'
'KC125153'
'KC125154'
'KC125155'
'KC125156'
'KC125157'
'KC125158'
'KC125159'
'KC125160'
'KC125161'
'KC125162'
'KC125163'
'KC125164'
'KC125165'
'KC125166'
'KC125167'
'KC125168'
'KC125169'
'KC125170'
'KC125171'
'KC125172'
'KC125173'
'KC125174'
'KC125175'
'KC125176'
'KC125177'
'KC125178'
'KC125179'
'KC125180'
'KC125181'
'KC125182'
'KC125183'
'KC125184'
'KC125185'
'KC125186'
'KC125187'
'KC125188'
'KC125189'
'KC125190'
'KC125191'
'KC125192'
'KC125194'
'KC125195'
'KC125196'
'KC125197'
'KC125198'
'KC125199'
'KC125200'
'KC125201'
'KC125202'
'KC125203'
'KC125204'
'KC125205'
'KC125206'
'KC125207'
'KC125208'
'KC125209'
'KC125210'
'KC125211'
'KC125212'
'KC125214'
'KC125215'
'KC125216'
'KC125217'
'KC125218'
'KC125219'
'KC125220'
'KC125221'
'KC125222'
'KC125223'
'KC125224'
'KC125225'
'KC125226'
'KC125227'
'KC125228'
'KC125229'
'KC125230'
'KC125231'
'KC125232'
'KC125233'
'KC125234'
'KC125235'
'KC125236'
'KC125237'
'KC125238'
'KC125239'
'KC125240'
'KC125241'
'KC125242'
'KC125243'
'KC125244'
'KC125245'
'KC125246'
'KC125247'
'KC125248'
'KC125249'
'KC125250'
'KC125251'
'KC125252'
'KC125254'
'KC125255'
'KC125256'
'KC125257'
'KC125258'
'KC125259'
'KC125260'
'KC125261'
'KC125262'
'KC125263'
'KC125264'
'KC125265'
'KC125266'
'KC125267'
'KC125268'
'KC125269'
'KC125270'
'KC125271'
'KC125272'
'KC125273'
'KC125274'
'KC125275'
'KC125276'
'KC125277'
'KC125278'
'KC125279'
'KC125280'
'KC125281'
'KC125282'
'KC125283'
'KC125284'
'KC125285'
'KC125286'
'KC125287'
'KC125288'
'KC125289'
'KC125290'
'KC125291'
'KC125292'
'KC125293'
'KC125294'
'KC125295'
'KC125296'
'KC125297'
'KC125298'
'KC125299'
'KC125300'
'KC125301'
'KC125302'
'KC125303'
'KC125304'
'KC125305'
'KC125306'
'KC125307'
'KC125308'
'KC125309'
'KC125310'
'KC125311'
'KC125312'
'KC125313'
'KC125314'
'KC125315'
'KC125316'
'KC125317'
'KC125318'
'KC125319'
'KC125320'
'KC125321'
'KC125322'
'KC125323'
'KC125324'
'KC125325'
'KC125326'
'KC125327'
'KC125328'
'KC125329'
'KC125330'
'KC125331'
'KC125332'
'KC125333'
'KC125334'
'KC125335'
'KC125336'
'KC125337'
'KC125338'
'KC125339'
'KC125340'
'KC125341'
'KC125342'
'KC125343'
'KC125344'
'KC125345'
'KC125346'
'KC125347'
'KC125348'
'KC125349'
'KC125350'
'KC125351'
'KC125353'
'KC125354'
'KC125355'
'KC125356'
'KC125357'
'KC125358'
'KC125359'
'KC125360'
'KC125361'
'KC125362'
'KC125363'
'KC125364'
'KC125365'
'KC125366'
'KC125367'
'KC125368'
'KC125369'
'KC125370'
'KC125371'
'KC125372'
'KC125373'
'KC125374'
'KC125375'
'KC125376'
'KC125377'
'KC125378'
'KC125379'
'KC125380'
'KC125381'
'KC125382'
'KC125383'
'KC125384'
'KC125385'
'KC125386'
'KC125387'
'KC125388'
'KC125389'
'KC125390'
'KC125391'
'KC125392'
'KC125393'
'KC125394'
'KC125395'
'KC125396'
'KC125397'
'KC125398'
'KC125399'
'KC125400'
'KC125401'
'KC125402'
'KC125403'
'KC125404'
'KC125405'
'KC125406'
'KC125407'
'KC125408'
'KC125409'
'KC125410'
'KC125411'
'KC125412'
'KC125413'
'KC125414'
'KC125415'
'KC125416'
'KC125417'
'KC125418'
'KC125419'
'KC125420'
'KC125421'
'KC125422'
'KC125423'
'KC125424'
'KC125425'
'KC125426'
'KC125427'
'KC125428'
'KC125429'
'KC125430'
'KC125431'
'KC125432'
'KC125433'
'KC125434'
'KC125435'
'KC125436'
'KC125437'
'KC125438'
'KC125439'
'KC125440'
'KC125441'
'KC125442'
'KC125443'
'KC125444'
'KC125445'
'KC125446'
'KC125447'
'KC125448'
'KC125449'
'KC125450'
'KC125451'
'KC125452'
'KC125453'
'KC125454'
'KC125455'
'KC125456'
'KC125457'
'KC125458'
'KC125459'
'KC125460'
'KC125461'
'KC125462'
'KC125463'
'KC125464'
'KC125465'
'KC125466'
'KC125467'
'KC125468'
'KC125469'
'KC125470'
'KC125471'
'KC125472'
'KC125473'
'KC125474'
'KC125475'
'KC125476'
'KC125477'
'KC125478'
'KC125479'
'KC125480'
'KC125481'
'KC125482'
'KC125483'
'KC125484'
'KC125485'
'KC125486'
'KC125487'
'KC125488'
'KC125489'
'KC125490'
'KC125491'
'KC125492'
'KC125493'
'KC125494'
'KC125495'
'KC125496'
'KC125497'
'KC125498'
'KC125499'
'KC125500'
'KC125501'
'KC125502'
'KC125503'
'KC125504'
'KC125505'
'KC125506'
'KC125507'
'KC125508'
'KC125509'
'KC125510'
'KC125511'
'KC125512'
'KC125513'
'KC125514'
'KC125515'
'KC125516'
'KC125517'
'KC125518'
'KC125519'
'KC125520'
'KC125521'
'KC125522'
'KC125523'
'KC125524'
'KC125525'
'KC125526'
'KC125527'
'KC125528'
'KC125529'
'KC125530'
'KC125531'
'KC125532'
'KC125533'
'KC125534'
'KC125535'
'KC125536'
'KC125537'
'KC125538'
'KC125539'
'KC125540'
'KC125541'
'KC125542'
'KC125543'
'KC125544'
'KC125545'
'KC125546'
'KC125547'
'KC125548'
'KC125549'
'KC125550'
'KC125551'
'KC125552'
'KC125553'
'KC125554'
'KC125555'
'KC125556'
'KC125557'
'KC125558'
'KC125559'
'KC125560'
'KC125561'
'KC125562'
'KC125563'
'KC125564'
'KC125565'
'KC125566'
'KC125567'
'KC125568'
'KC125569'
'KC125570'
'KC125571'
'KC125572'
'KC125573'
'KC125574'
'KC125575'
'KC125576'
'KC125577'
'KC125578'
'KC125579'
'KC125580'
'KC125581'
'KC125582'
'KC125583'
'KC125584'
'KC125585'
'KC125586'
'KC125587'
'KC125588'
'KC125589'
'KC125590'
'KC125591'
'KC125592'
'KC125593'
'KC125594'
'KC125595'
'KC125596'
'KC125597'
'KC125598'
'KC125599'
'KC125600'
'KC125601'
'KC125602'
'KC125603'
'KC125604'
'KC125605'
'KC125606'
'KC125607'
'KC125608'
'KC125609'
'KC125610'
'KC125611'
'KC125612'
'KC125613'
'KC125614'
'KC125615'
'KC125616'
'KC125617'
'KC125618'
'KC125619'
'KC125620'
'KC125621'
'KC125622'
'KC125623'
'KC125624'
'KC125625'
'KC125626'
'KC125627'
'KC125628'
'KC125629'
'KC125630'
'KC125631'
'KC125632'
'KC125633'
'KC125634'
'KC125635'
'KC125636'
'KC125637'
'KC125638'
'KC125639'
'KC125640'
'KC125641'
'KC125642'
'KC125643'
'KC125644'
'KC125645'
'KC125646'
'KC125647'
'KC125648'
'KC125649'
'KC125650'
'KC125651'
'KC125652'
'KC125653'
'KC125654'
'KC125655'
'KC125656'
'KC125657'
'KC125658'
'KC125659'
'KC125660'
'KC125661'
'KC125662'
'KC125663'
'KC125664'
'KC125665'
'KC125666'
'KC125667'
'KC125668'
'KC125669'
'KC125670'
'KC125671'
'KC125672'
'KC125673'
'KC125674'
'KC125675'
'KC125676'
'KC125677'
'KC125678'
'KC125679'
'KC125680'
'KC125681'
'KC125682'
'KC125683'
'KC125684'
'KC125685'
'KC125686'
'KC125687'
'KC125688'
'KC125689'
'KC125690'
'KC125691'
'KC125693'
'KC125694'
'KC125695'
'KC125696'
'KC125697'
'KC125698'
'KC125699'
'KC125700'
'KC125701'
'KC125702'
'KC125703'
'KC125704'
'KC125705'
'KC125706'
'KC125707'
'KC125708'
'KC125709'
'KC125710'
'KC125711'
'KC125712'
'KC125713'
'KC125714'
'KC125715'
'KC125716'
'KC125717'
'KC125718'
'KC125719'
'KC125720'
'KC125721'
'KC125722'
'KC125723'
'KC125724'
[truncated: 5,370 more rows]
